# Supplementary material
Source: PubMed Central journal article supplement (PMC4043372)
Supplement: NIHMS380569-supplement-1_si_001.pdf [file NIHMS380569-supplement-1_si_001.pdf]

# Supporting Information

## Nanopatterned Protein Films Directed by Ionic Complexation with Water-Soluble Diblock Copolymers

*Bokyung Kim, Christopher N. Lam and Bradley D. Olsen\**

Department of Chemical Engineering, Massachusetts Institute Technology

77 Massachusetts Avenue, Cambridge, Massachusetts 02139, United

\*Corresponding Author

Bradley D. Olsen

TEL) 1-617-715-4548

Email) [bdolsen@mit.edu](mailto:bdolsen@mit.edu)

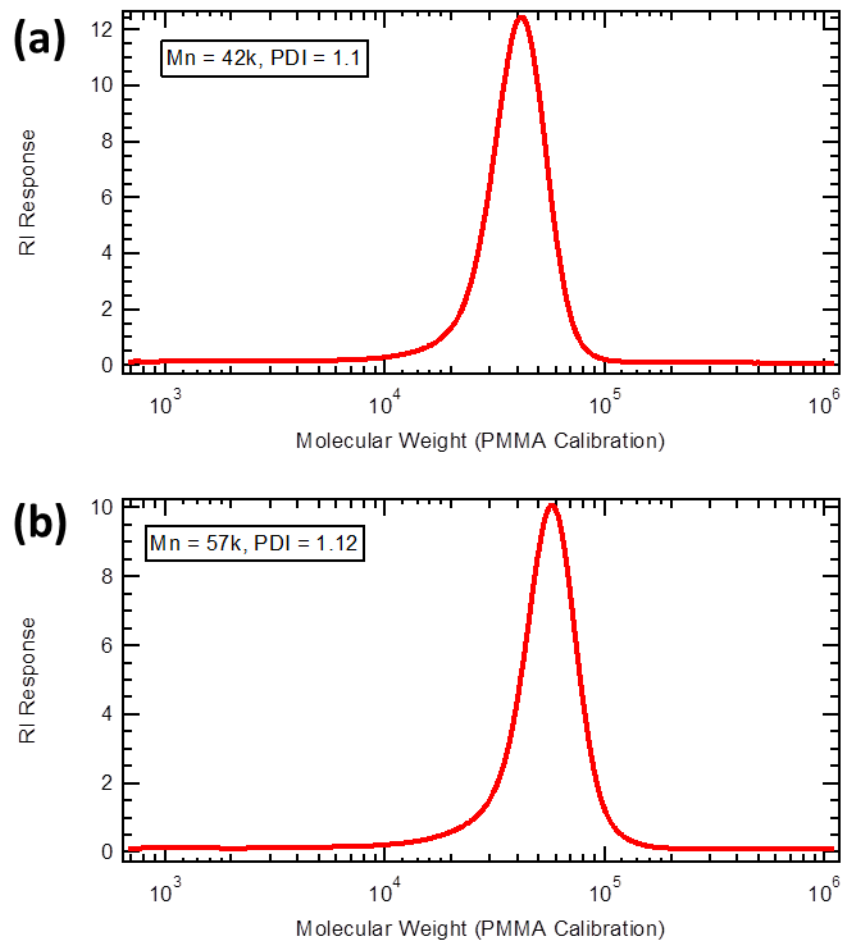

**Figure S1.** Gel permeation chromatography trace of (a) PNIPAM homopolymer and (b) PNIPAM-b-PDMAEA (PND) diblock copolymer.

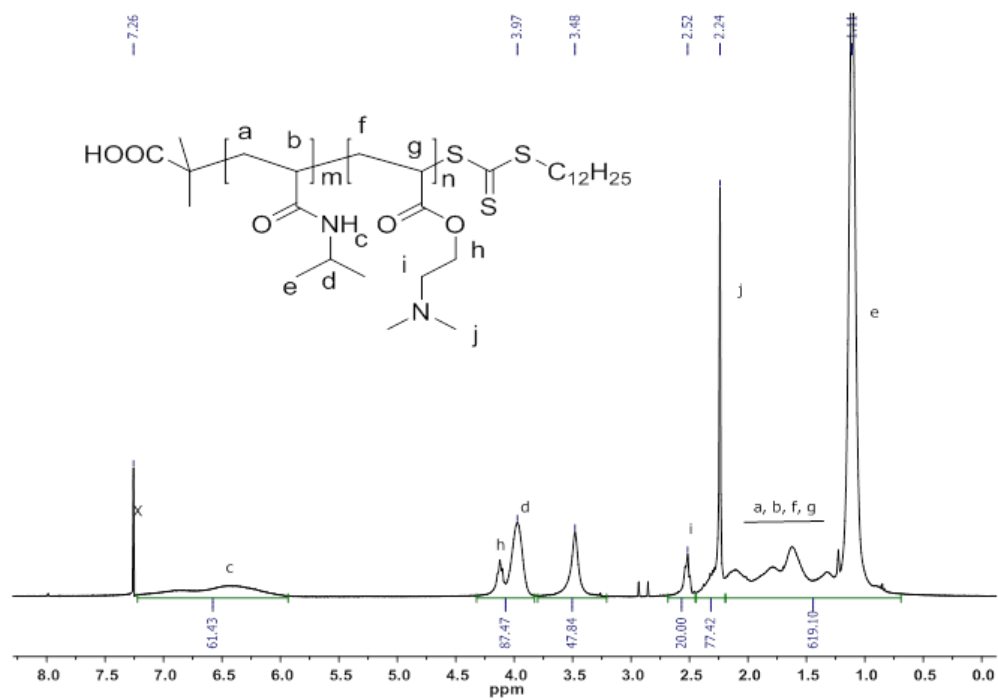

**Figure S2.**  $^1\text{H}$  NMR in  $\text{CDCl}_3$  of PND diblock copolymer. Chemical shift  $\delta = 3.5$  due to residual 1,4-dioxane.

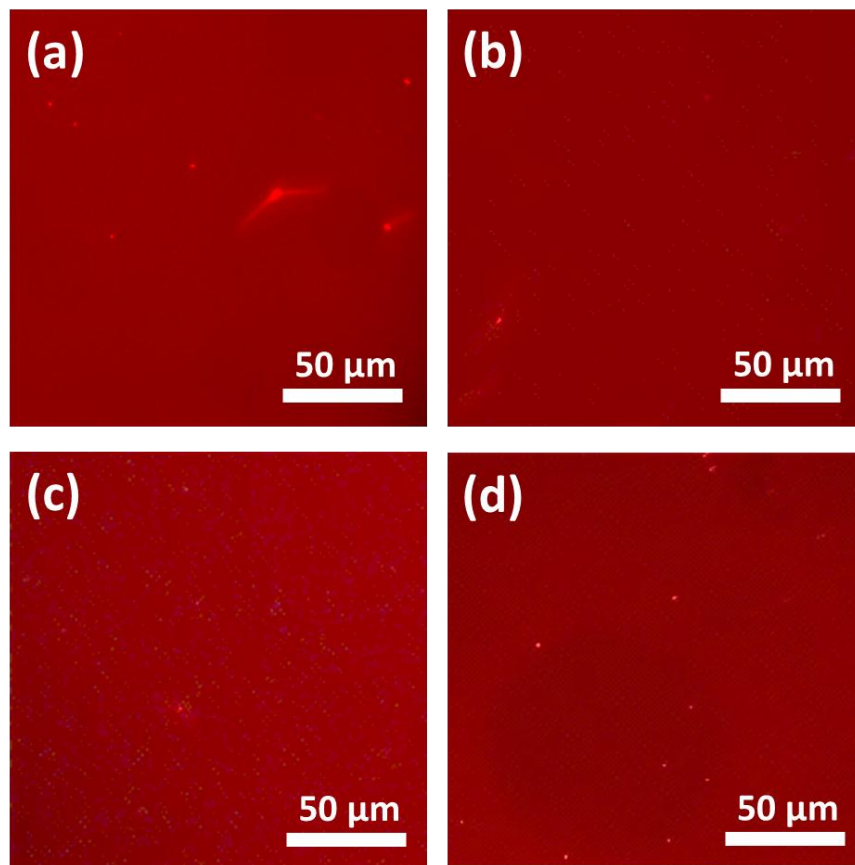

**Figure S3.** Fluorescence images of PND diblock copolymer films with various molar ratios of PND to mCherry, (a)  $r_m = 4.7$ , (b) 6.3, (c) 8.9, and (d) 11.1. As  $r_m$  increases in the film, the fracture-like structures and bright spots decrease in number.

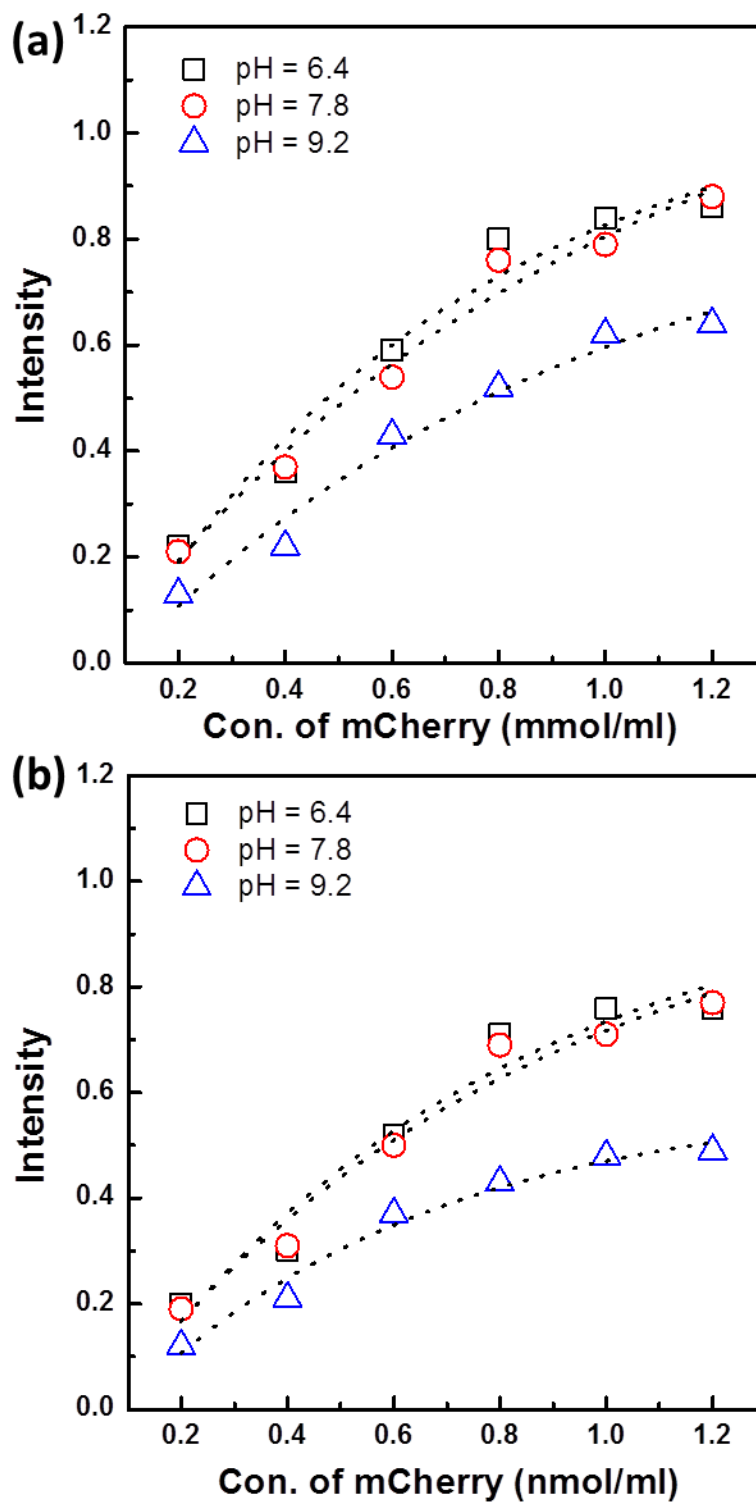

**Figure S4.** Calibration curves for determining (a) released and (b) remaining mCherry concentrations. The concentration of PND is 17 nmol/ml in (b).
